# Supplementary material for: The Combination of AHCC and ETAS Decreases Migration of Colorectal Cancer Cells, and Reduces the Expression of LGR5 and Notch1 Genes in Cancer Stem Cells: A Novel Potential Approach for Integrative Medicine
Source: MDPI journal article supplement (doi:10.3390/ph14121325), 2021-12-18
Supplement: s1 [file s1]

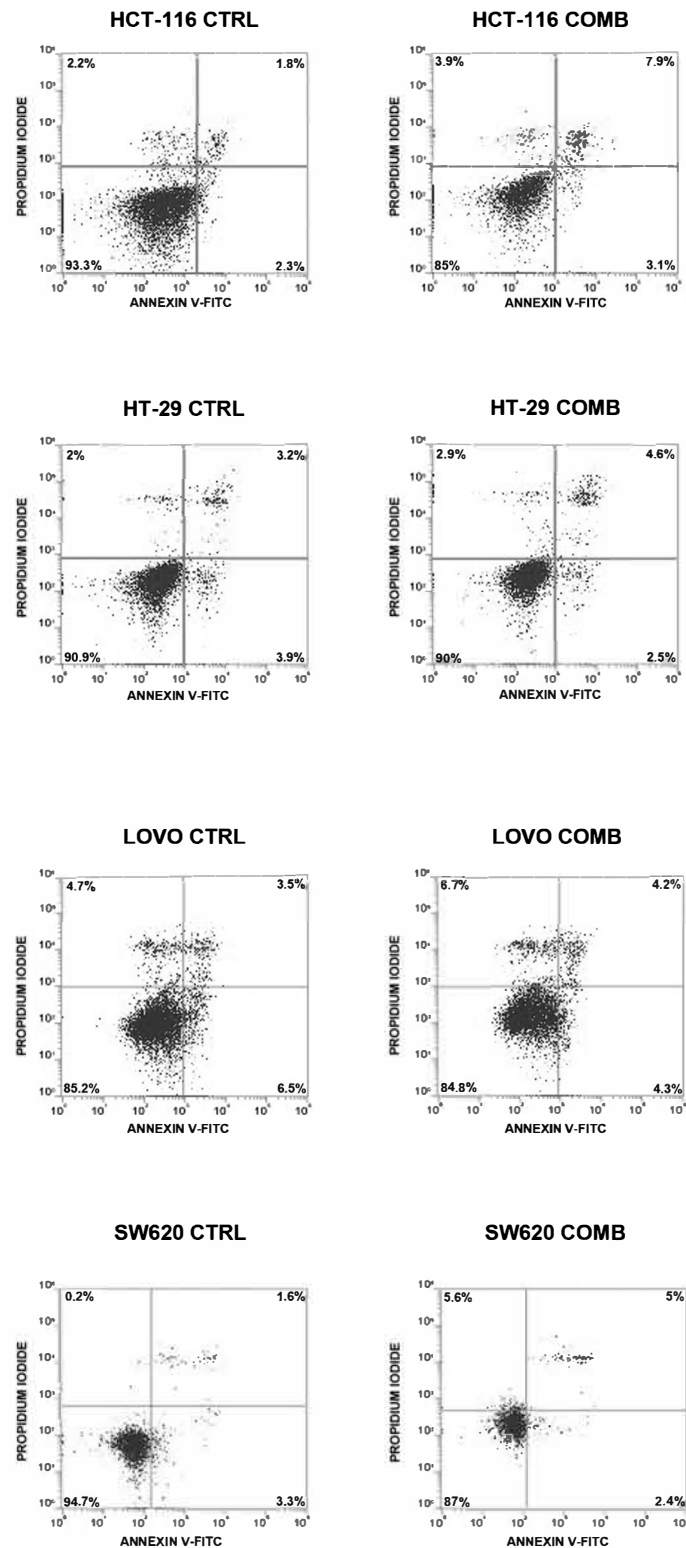

**Supplementary Figure S1.** AHCC and ETAS treatment does not affect CRC cells at 24 hours (a) Flow cytometric analysis of Annexin V-FITC/PI stained CRC cells treated with a combination of AHCC and ETAS (COMB) for 24 h. The percentages of early apoptotic cells (Annexin-V FITC+/PI-; bottom right quadrant) and late apoptotic/necrotic cells (Annexin-V FITC+/PI+; top right quadrant) are shown. "CTRL" indicates non-treated cells used as control cells.
